# Supplementary material
Source: PubMed Central journal article supplement (PMC7959163)
Supplement: NIHMS1678139-supplement-Supplemental_Material.pdf [file NIHMS1678139-supplement-Supplemental_Material.pdf]

**Supplementary Table 1:**

| Tissue Type            | Number of Samples Tested | Number of Diagnostic Findings | Diagnostic Yield |
|------------------------|--------------------------|-------------------------------|------------------|
| Blood                  | 967                      | 236                           | 24.4%            |
| Amniocyte              | 53                       | 15                            | 28.3%            |
| Skin                   | 52                       | 13                            | 25.0%            |
| Tongue                 | 19                       | 17                            | 89.5%            |
| Pancreas, Affected     | 19                       | 14                            | 73.7%            |
| Wilms Tumor            | 15                       | 12                            | 80.0%            |
| Kidney, Normal         | 12                       | 3                             | 25.0%            |
| Pancreas, Normal       | 9                        | 3                             | 33.3%            |
| Buccal Swab            | 6                        | 4                             | 66.7%            |
| Products of Conception | 6                        | 2                             | 33.3%            |
| Hepatoblastoma         | 3                        | 3                             | 100.0%           |
| Fibroblasts            | 3                        | 1                             | 33.3%            |
| Saliva                 | 2                        | 1                             | 50.0%            |
| Liver, Normal          | 2                        | 1                             | 50.0%            |
| Liver Cyst             | 1                        | 1                             | 100.0%           |
| Kidney, Affected       | 1                        | 1                             | 100.0%           |
| Thoracic Mass          | 1                        | 1                             | 100.0%           |
| Adenoid                | 1                        | 0                             | 0.0%             |
| Ewing's Sarcoma        | 1                        | 0                             | 0.0%             |
| Umbilical Tissue       | 1                        | 0                             | 0.0%             |

**Sample Types Tested.** A total of 20 sample types were tested. Sample type designations reflect what was indicated on requisition forms accompanying each submitted sample. Note, for skin samples, specific collection site information was unavailable. Diagnostic yield represents the proportion of samples of a given type within which a disease-causing change was identified.

**Supplementary Table 2:**

| <b>Number of Orders</b> | <b>Assay Combinations</b>                                                                |
|-------------------------|------------------------------------------------------------------------------------------|
| 568                     | Chr11p15.5 IC1/IC2 Methylation, Chr11p15.5 qRT-PCR Copy Number, <i>CDKN1C</i> sequencing |
| 249                     | Chr11p15.5 IC1/IC2 Methylation, Chr11p15.5 aCGH, <i>CDKN1C</i> sequencing                |
| 172                     | Chr11p15.5 IC1/IC2 Methylation, Chr11p15.5 aCGH                                          |
| 98                      | Chr11p15.5 IC1/IC2 Methylation                                                           |
| 49                      | <i>CDKN1C</i> sequencing                                                                 |
| 34                      | Chr11p15.5 IC1/IC2 Methylation, <i>CDKN1C</i> sequencing                                 |
| 3                       | Chr11p15.5 IC1/IC2 Methylation, Chr11p15.5 aCGH, <i>CDKN1C</i> sequencing, upd(7)mat     |
| 1                       | Chr11p15.5 qRT-PCR Copy Number                                                           |

**BWS Assay Combinations Ordered.** The number of orders indicate the number of tests performed for each BWS assay combination.

**Supplementary Table 3:**

| aCGH Result Type | Min. Size (kb) | Max. Size (kb) | ISCN Variant Nomenclature                                    | IC1 Methylation % | IC2 Methylation % |
|------------------|----------------|----------------|--------------------------------------------------------------|-------------------|-------------------|
| Loss             | 68.6           | 70.4           | arr[GRCh37]11p15.5(2440556x2,2441603_2510194x1,2510940x2)    | 52.89%            | 0.01%             |
| Loss             | 68.6           | 70.4           | arr[GRCh37]11p15.5(2440556x2,2441603_2510194x1,2510940x2)    | 49.36%            | 0.01%             |
| Gain             | 784.0          | 785.9          | arr[GRCh37]11p15.5(1531124x2, 1532014_2316047x3,2317025x2)   | 65.83%            | 49.47%            |
| cnROH            | 134705.5       | 134705.5       | arr[GRCh37]11p15.5q25(219089_134924542)x2 hmz                | 81.69%            | 13.03%            |
| Loss             | 1.7            | 2.2            | arr[GRCh37] 11p15.5(2022273x2,2022432_2024150x1~2,2024499x2) | 98.22%            | 50.34%            |
| Loss             | 1.7            | 2.2            | arr[GRCh37] 11p15.5(2022273x2,2022432_2024150x1~2,2024499x2) | 96.70%            | 49.82%            |
| cnROH            | 13562.2        | 13545.2        | arr[GRCh37]11p15.5p15.2(219089_13764295x2, 13781299x2) hmz   | 80.39%            | 13.06%            |

**Diagnostic aCGH findings.** Pathogenic CNVs and cnROH identified via aCGH testing. Values measured during concurrent methylation testing are shown for comparison.

**Supplementary Table 4:**

| Variant Type | cDNA      | Protein           |
|--------------|-----------|-------------------|
| Nonsense     | c.388G>T  | p.Glu130*         |
| Frameshift   | c.340delG | p.Ala114Leufs*157 |
| Nonsense     | c.703C>T  | p.Gln235*         |
| Nonsense     | c.694C>T  | p.Gln232*         |
| Nonsense     | c.694C>T  | p.Gln232*         |
| Frameshift   | c.675delG | p.Glu225Aspfs*47  |
| Nonsense     | c.676C>T  | p.Gln226*         |
| Nonsense     | c.237G>A  | p.Trp79*          |

**Pathogenic variants identified in *CDKN1C*.** All variants annotated with the NM\_000076.2 transcript.

**Supplementary Table 5:**

| Phenotypic Feature     | <i>CDKN1C</i><br>n=8 |
|------------------------|----------------------|
| Lateralized Overgrowth | 12.5% (1)            |
| Macroglossia           | 50.0% (4)            |
| Omphalocele            | 100.0% (8)           |
| Wilms tumor            | 0.0% (0)             |

**Frequency of phenotypic features among individuals with pathogenic variants in *CDKN1C*.**
